# Supplementary material for: Artemisia argyi allelopathy: a generalist compromises hormone balance, element absorption, and photosynthesis of receptor plants
Source: PubMed Central journal article supplement (PMC9317128; doi:10.1186/s12870-022-03757-9), 2022-07-26
Supplement: 12870_2022_3757_MOESM1_ESM.pdf [file 12870_2022_3757_MOESM1_ESM.pdf]

## SUPPORTING INFORMATION

### ***Artemisia argyi* allelopathy: a generalist compromises hormone balance, element absorption and photosynthesis of receptor plants**

**Jinxin Li<sup>†</sup>, Tingting Zhao<sup>†</sup>, Le Chen, Hong Chen, Dandan Luo, Changjie Chen,  
Yuhuan Miao\* and Dahui Liu\***

Key Laboratory of Traditional Chinese Medicine Resources and Chemistry of Hubei Province, Hubei University of Chinese Medicine, Wuhan 430065, China

\* For correspondence (e-mails [liudahui@hbtcn.edu.cn](mailto:liudahui@hbtcn.edu.cn); [miaoyh@hbtcn.edu.cn](mailto:miaoyh@hbtcn.edu.cn)).

<sup>†</sup> These authors contributed equally to this work.

**Figure S1**

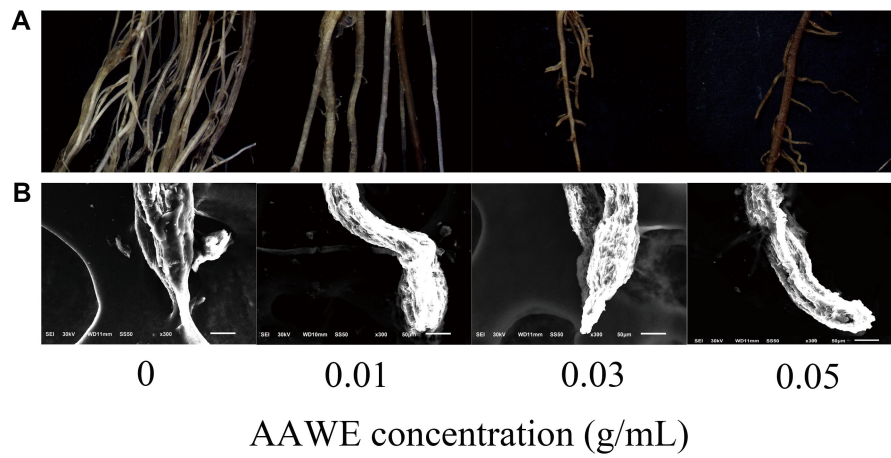

**Figure S1.** Roots were destructed in AAVE-treated rice.

(A) Root development and branching under different treatment conditions.

(B) Scanning electron microscopy of wild-type and AAVE-treated root tips. Scale bars, 50  $\mu\text{m}$ .

**Figure S2**

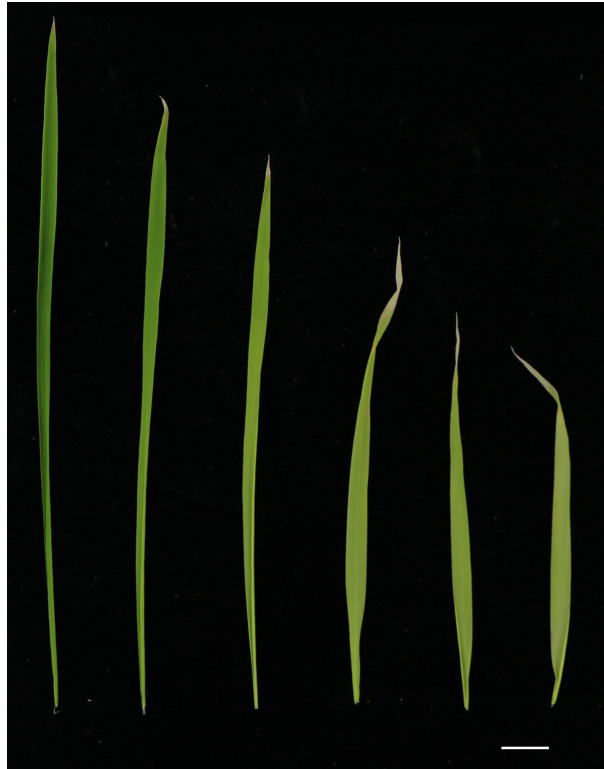

**Figure S2.** The AAWE-treated rice leaves were abnormal.

Leaf rolling, yellowing and withering occurred in AAWE-treated rice leaves. The leaves from left to right showed control, 0.01 g/mL, 0.02 g/mL, 0.03 g/mL, 0.04 g/mL, 0.05 g/mL AAWE treatment. Scale bar, 1 cm.

**Figure S3**

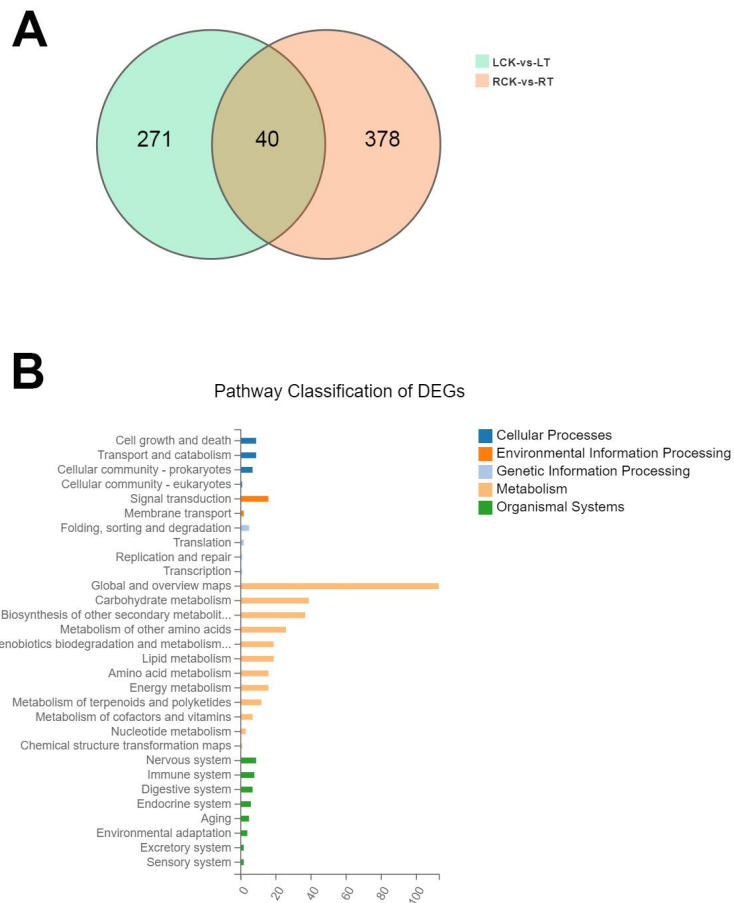

**Figure S3.** Preliminary analysis of DEGs between control and AAWE-treated rice.

(A) The number of DEGs distributed in leaves and roots after screening ( $|\text{Log}_2\text{FC}| \geq 1$ ).

(B) KEGG classification results of DEGs.

**Figure S4**

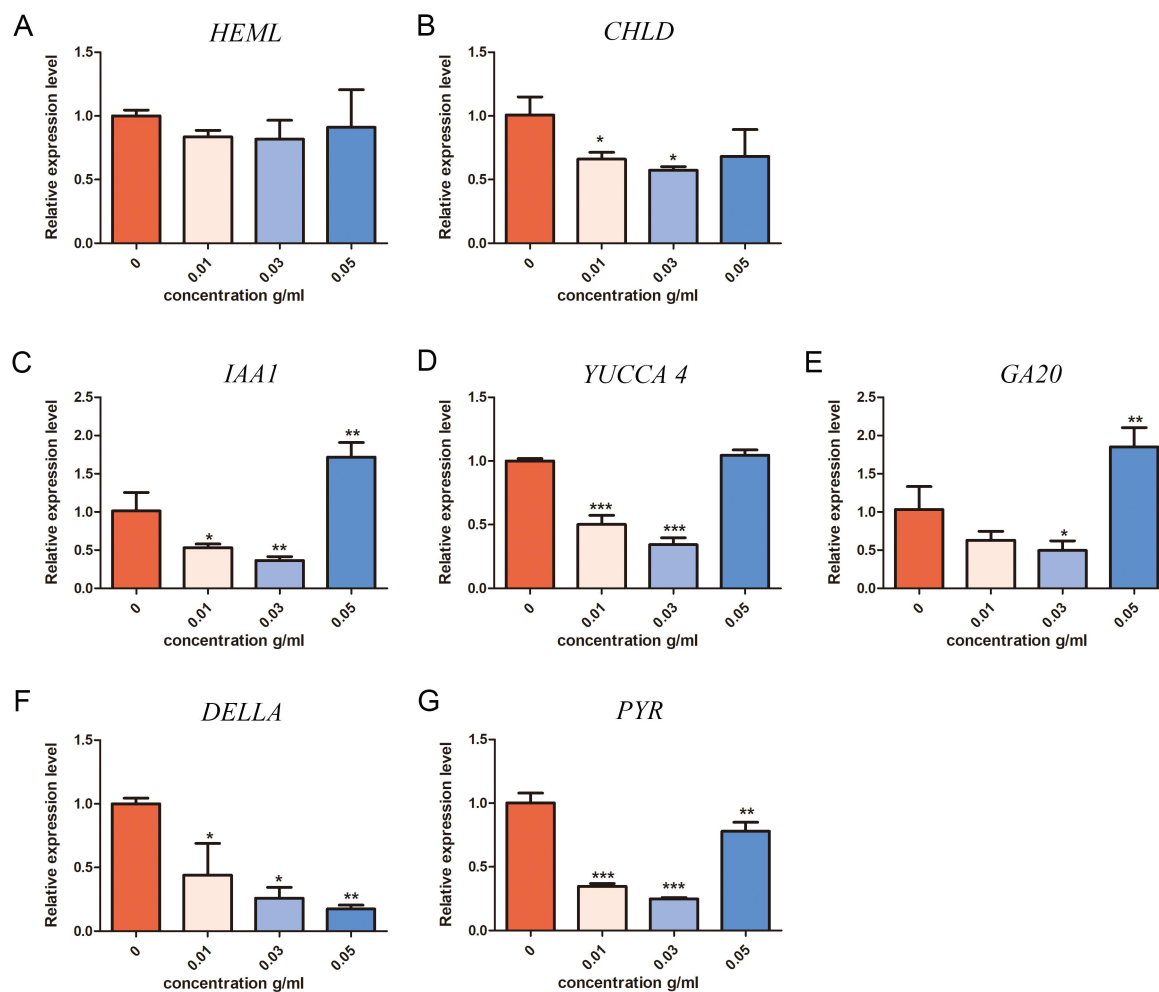

**Figure S4.** Relative expression levels of genes in rice leaves and roots under AWE treatment.

(A-B) Genes that are not differentially expressed related to the chlorophyll synthesis pathway in control and AWE-treated leaves.

(C-G) Expression levels of hormone-related genes in roots. C, *IAA1*, related to auxin synthesis; D, *YUCCA4*, related to auxin signalling pathways; E, *GA20*, related to gibberellin synthesis; F, *DELLA*, related to gibberellin signalling pathways; G, *PYR*, related to abscisic acid signalling pathways.

**Table S1. Details of key driver genes.**

| Gene ID   | Gene Symbol    | Describe                                                           | Function comment information                          |                                                                                                                                  |
|-----------|----------------|--------------------------------------------------------------------|-------------------------------------------------------|----------------------------------------------------------------------------------------------------------------------------------|
|           |                |                                                                    | KEGG Pathway                                          | GO Biological Process                                                                                                            |
| LC4342117 | LOC_Os06g51084 | 1,4-alpha-glucan-branching enzyme, chloroplastic/amyloplastic-like | Starch and sucrose metabolism                         | carbohydrate metabolic process<br>glycogen biosynthetic process                                                                  |
| LC4333062 | LOC_Os03g28330 | sucrose synthase 1-like                                            | Starch and sucrose metabolism                         | sucrose metabolic process<br>response to carbon dioxide                                                                          |
| LC4343045 | LOC_Os07g23944 | alpha-glucosidase 2                                                | Galactose metabolism<br>Starch and sucrose metabolism | carbohydrate metabolic process                                                                                                   |
| LC4331252 | LOC_Os02g58480 | sucrose synthase 6-like                                            | Starch and sucrose metabolism                         | sucrose metabolic process                                                                                                        |
| LC4329561 | LOC_Os02g33110 | beta-fructofuranosidase, insoluble isoenzyme 1-like                | Galactose metabolism<br>Starch and sucrose metabolism | carbohydrate metabolic process                                                                                                   |
| LC4335447 | LOC_Os04g24430 | sucrose synthase 5-like                                            | Starch and sucrose metabolism                         | sucrose metabolic process                                                                                                        |
| LC4332788 | LOC_Os03g22120 | sucrose synthase 4-like                                            | Starch and sucrose metabolism                         | sucrose metabolic process                                                                                                        |
| LC4348840 | LOC_Os10g32810 | beta-amylase 1, chloroplastic-like                                 | Starch and sucrose metabolism                         | polysaccharide catabolic process                                                                                                 |
| LC4331577 | LOC_Os03g04770 | beta-amylase 2, chloroplastic-like                                 | Starch and sucrose metabolism                         | polysaccharide catabolic process<br>carbohydrate metabolic process<br>cell proliferation                                         |
| LC4335790 | LOC_Os04g33740 | beta-fructofuranosidase, insoluble isoenzyme 2-like                | Galactose metabolism<br>Starch and sucrose metabolism | defense response to bacterium<br>leaf development<br>cotyledon development<br>defense response to fungus<br>carbohydrate storage |

**Table S2.** The sequence of gene-specific primers for RT-qPCR analysis.

| Primer name  | Primer sequence               | Description |
|--------------|-------------------------------|-------------|
| Actin-F      | TGTAAGCAACTGGGATGA            | RT-qPCR     |
| Actin-R      | CCTTCGTAGATTGGGACT            |             |
| HEMA-F       | GATGCAATCACTGCTGGAAAGCGT      | RT-qPCR     |
| HEMA-R       | CCATCTTGCCAGCACCAATCAACA      |             |
| HEML-F       | AGAACAAAGGGCAGATTGCTGCTG      | RT-qPCR     |
| HEML-R       | TGTTTCGTCAAGTCACGGAGAGCA      |             |
| CHLD-F       | TAGCACAGCTGTCAGAGTGGGTTT      | RT-qPCR     |
| CHLD-R       | TTGCCAGCCACCTCAAGTATCTCA      |             |
| CHLH-F       | GCACGGGAAGTTGGCGTTTCATTA      | RT-qPCR     |
| CHLH-R       | ACATGTCCTGGAGCTGCTTCTCAT      |             |
| CRD-F        | TGGATCTAACATGACACGCACCCA      | RT-qPCR     |
| CRD-R        | ACTGTAACGGCATTCTTCTCCGGT      |             |
| CHLG-F       | CCAGCCACTGATGAAAGCAGCAAT      | RT-qPCR     |
| CHLG-R       | AGAGCGCTAATACTCGCGAACA        |             |
| CAO-F        | ACACCTTCATCTGGGCTTCAAGGA      | RT-qPCR     |
| CAO-R        | AGATGCGTCGAACATTGCTTGGTG      |             |
| PsbY-F       | CGCAGCGACATTGCACTCACC         | RT-qPCR     |
| PsbY-R       | TGACGCCTTCTTCTTCCTCCTCTT      |             |
| Os04g38410-F | TGACGCCTTCTTCTTCCTCCTCTT      | RT-qPCR     |
| Os04g38410-R | GCTACTGCTCCTCCGACCTCCAAT      |             |
| YUCCA4-F     | GGCCGGCCTAATTTTAACTGG         | RT-qPCR     |
| YUCCA4-R     | TTCTCAAAAAGACGCGCGAC          |             |
| IAA1-F       | GCCGCTCAATGAGGCATT            | RT-qPCR     |
| IAA1-R       | GCTTCCACTTTCTTTCAATCCAA       |             |
| GA20-F       | GCCACTACAGGGCCGACAT           | RT-qPCR     |
| GA20-R       | TGGTTGCAGGTGACGATGAT          |             |
| DELLA-F      | CTACTACTCCACCATGTTTCGAT       | RT-qPCR     |
| DELLA-R      | CTGTTTGTAGGCATTGGAGC          |             |
| NCDE4-F      | GATTGCACGGCACCTTCATT          | RT-qPCR     |
| NCDE4-R      | CTCTGTAATTTGATTTTTCACTGGCTAAT |             |
| PYR-F        | GTAGTTCCTCCATTGTCTTC          | RT-qPCR     |
| PYR-R        | GACCTAAGCCCATCACTA            |             |
